# Slowing of the Hippocampal $\theta$ Rhythm Correlates with Anesthetic-induced Amnesia

Misha Perouansky, M.D.,\* Vinuta Rau, Ph.D.,† Tim Ford,‡ S. Irene Oh, B.S.,§ Mark Perkins, B.S.,|| Edmond I Eger II, M.D.,# Robert A. Pearce, M.D., Ph.D.\*\*

## ABSTRACT

**Background:** Temporary, antegrade amnesia is one of the core desirable endpoints of general anesthesia. Multiple lines of evidence support a role for the hippocampal  $\theta$  rhythm, a synchronized rhythmic oscillation of field potentials at 4–12 Hz, in memory formation. Previous studies have revealed a disruption of the  $\theta$  rhythm at surgical levels of anesthesia. We hypothesized that  $\theta$ -rhythm modulation would also occur at subhypnotic but amnesic concentrations. Therefore, we examined the effect of three inhaled agents on properties of the  $\theta$  rhythm considered critical for the formation of hippocampus-dependent memories.

**Methods:** We studied the effects of halothane and nitrous oxide, two agents known to modulate different molecular targets (GABAergic [ $\gamma$ -aminobutyric acid] *vs.* non-GABAergic, respectively) and isoflurane (GABAergic and non-GABAergic targets) on fear-conditioned learning and  $\theta$  oscillations in freely behaving rats.

**Results:** All three anesthetics slowed  $\theta$  peak frequency in proportion to their inhibition of fear conditioning (by 1, 0.7, and 0.5 Hz for 0.32% isoflurane, 60% N<sub>2</sub>O, and 0.24%

halothane, respectively). Anesthetics inconsistently affected other characteristics of  $\theta$  oscillations.

**Conclusions:** At subhypnotic amnesic concentrations,  $\theta$ -oscillation frequency was the parameter most consistently affected by these three anesthetics. These results are consistent with the hypothesis that modulation of the  $\theta$  rhythm contributes to anesthetic-induced amnesia.

## What We Already Know about This Topic

- ❖ Hippocampal  $\theta$  rhythm, a characteristic oscillation at a frequency of 4–12 Hz, has been associated with memory formation
- ❖ Disruption of this rhythm impairs learning and memory

## What This Article Tells Us That Is New

- ❖ Subhypnotic concentrations of three inhaled anesthetics with distinct molecular actions slowed hippocampal  $\theta$  rhythm in proportion to their inhibition of fear conditioning
- ❖ Slowing of hippocampal  $\theta$  rhythm is a possible mechanism for disruption of hippocampus-dependent memory by anesthetics

\* Professor, ‡ Student Researcher, || Research Specialist, \*\* Professor and Chair, Department of Anesthesiology, University of Wisconsin School of Medicine and Public Health, Madison, Wisconsin. † Assistant Researcher, § Staff Research Associate, # Professor Emeritus, Department of Anesthesiology and Perioperative Care, University of California, San Francisco, San Francisco, California.

Received from the Department of Anesthesiology, University of Wisconsin School of Medicine and Public Health, Madison, Wisconsin. Submitted for publication February 16, 2010. Accepted for publication August 9, 2010. Supported by Grant nos. NS056411 (to Dr. Pearce) and GM47818 (to Drs. Rau, Eger, Pearce and Perouansky) from the National Institutes of Health (Bethesda, Maryland). Support was also provided from institutional and/or departmental sources. Presented in part at the Annual Meeting of the American Society of Anesthesiologists, San Francisco, California, October 13–17, 2007, and at the 37th Annual Meeting of the Society for Neuroscience, San Diego, California, November 3–7, 2007.

Address correspondence to Dr. Perouansky: Physiology/Anesthesiology Labs, 601 Science Dr, Madison, Wisconsin 53711. mperouansky@wisc.edu. Information on purchasing reprints may be found at [www.anesthesiology.org](http://www.anesthesiology.org) or on the masthead page at the beginning of this issue. ANESTHESIOLOGY's articles are made freely accessible to all readers, for personal use only, 6 months from the cover date of the issue.

AMNESIA is one of the essential desirable elements of the Anesthetic state along with unconsciousness (hypnosis) and immobility. The postanesthesia recall of contextually rich (episodic) memories in particular is highly undesirable and a potential cause of morbidity.

Behavioral anesthetic effects are attributed to interactions with specific proteins (as opposed to nonspecific effects on lipid membranes). Indeed, anesthetic interactions with numerous plausible molecular targets have been and continue to be documented extensively.<sup>1,2</sup> Clinically used inhalational anesthetics are chemically diverse. Despite different receptor-level activity profiles and potencies, all inhaled anesthetics impair learning and memory at concentrations that are subhypnotic and, typically, are only a fraction of the standard concentration required for immobility in surgery.<sup>3–6</sup> For example, both the alkane halothane, which markedly enhances  $\gamma$ -aminobutyric acid receptor type A-mediated inhibition, and the non- $\gamma$ -aminobutyrate-gate (non-GABAergic) gas nitrous oxide suppress inhibitory-avoidance training at comparable lipid solubility-corrected concentrations.<sup>7</sup> Likewise, the anesthetic isoflurane and the nonimmobilizer 1,2-dichlorohexafluorocyclobutane (F6 or 2N, an experimental drug)

suppress fear conditioning (FC) at similar concentrations.<sup>5,8</sup> It is noteworthy that both substances are more potent inhibitors of FC to context (hippocampus-dependent) than FC to tone (hippocampus-independent).<sup>5,8</sup> The preferential sensitivity of hippocampus-dependent learning to suppression by anesthetic-like compounds is not related to specific molecular targets in any obvious pattern. Isoflurane enhances GABAergic and inhibits glutamatergic synaptic transmission<sup>9,10</sup> and blocks hippocampal long-term potentiation<sup>11</sup> whereas F6 has no known effect on these processes.<sup>12,13</sup>

These observations prompt the question of whether all anesthetics similarly affect a single amnesia-promoting molecular target or whether aggregate actions on different targets converge at some higher level of signal integration of particular importance for hippocampal learning and memory. The experiments presented here investigate the latter possibility.

The hippocampal  $\theta$  rhythm is a prominent network activity of the "online" hippocampus and can be separated into atropine-sensitive (type 2) and atropine-resistant (type 1) components. Type 1  $\theta$  is suppressed by surgical levels of anesthesia.<sup>14</sup> Indeed, based on this observation, it was proposed more than 30 yr ago that suppression of this noncholinergic activation of the cerebrum may mediate the behavioral effects of anesthesia.<sup>14</sup> Since then, substantial evidence has accumulated demonstrating that the  $\theta$  rhythm serves an essential network-level role in hippocampal learning and memory.<sup>15,16</sup> For example,  $\theta$  oscillations facilitate plasticity<sup>17</sup> and support mnemonic processes requiring interregional signal integration.<sup>18–20</sup> Conversely, suppression of the  $\theta$  rhythm impairs learning and memory.<sup>21–23</sup>

We hypothesized that modulation of type 1  $\theta$  oscillations might serve as a common network-level mechanism of anesthetic-induced impairment of hippocampus-dependent learning and memory. If this hypothesis were correct, some measure of  $\theta$  activity should vary with anesthetic concentrations in the amnestic (but subhypnotic) range. We tested this hypothesis by analyzing the effect of three inhaled anesthetics on type 1  $\theta$  oscillations. We found that  $\theta$  frequency—but not other parameters of the  $\theta$  rhythm—changed systematically with anesthetic dose. We conclude that these results are consistent with the hypothesis that slowing  $\theta$  frequency correlates with suppression of hippocampus-dependent learning and memory.

## Materials and Methods

### Behavioral Experiments

Experiments were approved by the University of California, San Francisco, Institutional Animal Care and Use Committee. Naive adult (aged 70–90 days) male Sprague-Dawley rats (Harlan, Indianapolis, IN) were used in these studies. The rats were housed 3 to a cage (42 × 25 × 20 cm) with food and water available *ad libitum*. The rats were kept on a 12-h light-dark cycle, with transitions occurring at 6:00 AM/PM. All experimental procedures took place during the light

cycle. All rats were handled daily (~20 s) for a week before each experiment.

An equilibration chamber, which was similar to the rats' home cages, was used for anesthesia delivery before FC. It was covered with a plastic slab pierced with two small conduits that allowed inflow and sampling of gases. A 17-cm diameter hole in the slab was capped by a 20 × 17-cm plastic cylinder. This chimney-like structure allowed the escape of excess gases as well as rapid movement of rats into and out of the equilibration chamber with minimal disturbance to anesthetic concentrations. Gas inflow was delivered to the circuit in a 5 l/min oxygen flow through a vaporizer (Isotec 4; Datex, Los Angeles, CA) set to the desired concentration. We used a gas chromatograph (Gow-Mac Instrument Co., Bethlehem, PA) equipped with a flame ionization detector to measure concentrations of inhaled anesthetics. The 4.6-m, 0.22-cm column was packed with SF-96. The column temperature was 100°C. The detector was maintained approximately 50°C warmer than the column. The carrier gas flow was nitrogen at a flow of 15–20 ml/min. The detector received 35–38 ml/min hydrogen and 240–320 ml/min air. Primary standards were prepared, and response linearity of the chromatograph was determined. We also used secondary (cylinder) standards referenced to primary standards. An infrared analyzer (Daytex Instrumentarium Corp., Helsinki, Finland) was also used to continually monitor anesthetic concentrations in addition to the sampling described above.

The FC chambers (32 × 25 × 25 cm) were constructed of clear acrylic. These airtight chambers allowed the continuous delivery of inhaled anesthetics at a constant concentration by vaporizer. Two 2-cm diameter conduits on opposing sides of the chamber allowed inflow and the outflow of gases to all four chambers. The grid floor used to deliver shock was composed of 19 stainless steel bars, each 4 mm in diameter, spaced 16 mm center to center. These floors were connected to a shock delivery system (Med Associates, Inc., St. Albans, VT). The chambers were wiped down with a pine-scented cleaner (5% pine-scented disinfectant; Midland, Inc., Sweetwater, TN) before and after each session. In the room where training took place, the overhead fluorescent bulbs were left on and a ventilation fan provided background noise (65 dB). The appearance, odor, and texture of the chambers and room comprised the training context.

Four rats, counterbalanced for group assignment, were trained at a time. After a 3-min baseline exploratory period in the chambers, rats received three 30 s tones (2,000 Hz, 90 dB) coterminating with a shock (1 mA, 2 s) pairings, separated by 60 s and were removed from the chamber after an additional 30 s.

The next day, rats were tested for fear to the training context and fear to tone without anesthetics. For the context test, each rat was placed back in the chamber where it was trained for 8 min in the absence of tone and shock. For the tone test, groups of four rats were transported in separate plastic pots (14 × 15.5 cm) to a different context in a separate room. Test chambers, which were equipped with a

**Table 1.** Experimental Design and Protocol for Fear Conditioning Experiments

| Experiment    | Rats, No. | Day 1                       |                           | Day 2             |                   |
|---------------|-----------|-----------------------------|---------------------------|-------------------|-------------------|
|               |           | Anesthetic Concentration, % | Training                  | Context/tone test | Tone/context test |
| Halothane     | 8         | 0                           | Three tone-shock pairings | Context/tone test | Tone/context test |
|               | 8         | 0.25                        |                           |                   |                   |
|               | 8         | 0.5                         |                           |                   |                   |
|               | 7         | 1                           |                           |                   |                   |
| Isoflurane    | 8         | 0                           |                           |                   |                   |
|               | 8         | 0.3                         |                           |                   |                   |
|               | 8         | 0.6                         |                           |                   |                   |
|               | 8         | 0.9                         |                           |                   |                   |
| Nitrous oxide | 8         | 0                           |                           |                   |                   |
|               | 8         | 30                          |                           |                   |                   |
|               | 8         | 45                          |                           |                   |                   |
|               | 8         | 60                          |                           |                   |                   |
|               | 8         | 75                          |                           |                   |                   |

speaker, were triangular with an acrylic floor ( $28 \times 25$  cm) and two acrylic sidewalls ( $28 \times 22$  cm) at a  $45^\circ$  angle. Chambers were wiped down with acetic acid (1%; Thermo Fisher Scientific, Waltham, MA) before and after each training session. The room appeared dark to the rats, being lit by a single red 30-W red bulb. White noise (65 dB) was used for background noise. The order of the context and tone tests was counterbalanced, so that half of each treatment group was tested to context first, tone second, and *vice versa*. "Freezing," defined as the absence of all movement except that necessary for respiration, is an innate defensive fear response in rodents and a reliable measure of learned fear.<sup>24,25</sup> Each rat's freezing behavior was scored by an observer blinded to the treatment history every 8 s during the observation period (*i.e.*, 60 observations per rat for each experiment). A percentage was calculated by dividing the number of freezing observations by the total number possible during the observation period.

Experiments were conducted with separate groups of eight rats for each of the three agents as summarized in table 1. One rat in the 1% halothane group died during the equilibration portion of the experiment before training, leaving one group with seven rats. We considered the minimal alveolar concentration (MAC) for halothane, isoflurane, and nitrous oxide to be 1.1, 1.38,<sup>26</sup> and 221%.<sup>27</sup>

### Statistical Analysis

For FC, we used nonlinear regression (SPSS, Chicago, IL) to calculate  $EC_{50}$  values and the maximum value of the dose-response curve for context- and tone-conditional freezing.

The following equation was used in the regression:  $\text{freezing} = A \times (\text{isoflurane}^{n_H} / \{\text{isoflurane}^{n_H} / EC_{50}^{n_H} + 1\})$ , where freezing indicates the percentage of time rats displayed freezing behavior during the observation period,  $A$  is maximal freezing value, and  $n_H$  is the Hill coefficient. Results of FC experiments are presented as mean  $\pm$  SE.

### Electrophysiological Experiments

All experiments were conducted according to guidelines specified in the Guide for the Care and Use of Laboratory Animals (Institute of Laboratory Animal Resources, National Research Council) and were approved by the University of Wisconsin Animal Care and Use Committee (Madison) and have been described previously.<sup>28</sup>

### Animal Husbandry

Young adult male Sprague-Dawley rats were housed in the animal care facility of the University of Wisconsin with free access to food and water. Thirteen rats underwent electrode implantation. After electrode implantation, the animals recovered for at least 7 days before being exposed to volatile agents. After each exposure, animals were observed until full recovery and then transferred back into their home cages. Each animal was exposed to an agent only once per day.

### Electrode Preparation

Linear microwire array recording electrodes with four sites spaced 200  $\mu\text{m}$  apart were fabricated from 30  $\mu\text{m}$  formvar-insulated nichrome wire.<sup>29</sup> In brief, a piece of polytetrafluoroethylene tubing of 300  $\mu\text{m}$  ID was cut along its long axis, and one half of the tubing was used as a form for the electrode array. Four holes were punched in the tubing at 200- $\mu\text{m}$  intervals, and a single piece of 35  $\mu\text{m}$  formvar-insulated NiChrome wire (CFW-188-0012-HFV; California Fine Wire Co., Grover Beach, CA) was passed through each hole. Each wire was bent at a  $90^\circ$  angle to lie parallel to the inside wall of the form. The hemicylinder of tubing with the microwire bundle was filled with epoxy resin (Epoxytite 6001-M; Epoxytite Corp., St. Louis, MO) and heat cured. After discarding the polytetrafluoroethylene tubing, the hardened resin hemicylinder formed the shank of the electrode, and the wires were then broken off at right angles to the long axis of the array to form recording sites. Finally, the resin matrix was sharpened at the tip to facilitate pen-

etration of the brain, with the closest electrode approximately 25  $\mu\text{m}$  away from the tip. The bare wires of the electrode array were connected to a Neuralynx EIB-16 interface board with an Neuralynx HS-16 Omnetics nanoconnector (Neuralynx, Inc., Tucson, AZ) suitable for connecting to a small headstage.

### Electrode Implantation

For implantation, animals were anesthetized with isoflurane and placed in a stereotactic apparatus. Miniature stainless steel machine screws were inserted through the right and left frontal, right parietal, and left occipital bones and advanced until contact was made with the dura. They served as anchors for the electrode assembly and as surface electrodes, with the screw in the occipital bone used as animal ground for reference. An additional hole was drilled 3.0 mm caudal to bregma and 2.0 mm lateral to the midline. The electrode array was advanced 2.6 mm below the surface of the cortex. After an animal had undergone all planned experiments, it was sacrificed to verify electrode location. Histologic examination showed that electrodes were successfully implanted into the CA1 region of the dorsal hippocampus in eight rats and the signal from the electrode closest to the hippocampal fissure was used for field-potential analysis.

### Experimental Procedures

On the day of an experiment, the animal was placed into a custom-made 10-l chamber made of clear acrylic and equipped with ports for drug injection, gas sampling, and connection to the recording equipment. The footprint of the area that could be explored by the rat was  $19 \times 15$  cm, which did not allow running. Adhesive tape sealed the lid of the chamber and all ports. Five minutes of acclimation were followed by a 15-min control period, after which a loading dose of the drug to be tested was injected. Distilled water was injected for control experiments. A fan accelerated the evaporation and distribution of volatile agents that were deposited into a glass Petri dish *via* a polytetrafluoroethylene tube. Soda lime scavenged carbon dioxide. We took gas samples from the chamber with airtight glass syringes for gas chromatography at 5, 15, 22.5, and 30 min after the initial drug injection. The last three measurements were averaged and considered to represent the tested concentration. The concentration of the drug was kept approximately constant by injecting additional small boluses 10 and 20 min after the initial injection. In preliminary experiments, we determined that, with this protocol, it was possible to maintain stable concentrations (within 20% of reported concentrations) of the agent throughout the 30 min of drug exposure. Drug washout was achieved by suctioning the chamber and allowing fresh air to enter the chamber. The oxygen concentration in the chamber was constantly monitored with a gas analyzer (POET II; Criticare Systems, Inc., Waukesha, WI) and maintained above 20%. In most experiments, a dedicated but electroencephalogram-naïve observer scored animal behavior. In addition,

we videotaped animals for *post hoc* analysis. The 15 min before drug injection (0–15 min), before drug removal (30–45 min), and before the end of the experiment (60–75 min) were defined as the “control,” “test,” and “recovery” time periods for these analyses.

### Behavioral Scoring

For electrophysiological experiments, the observer classified behavior as immobile, exploring, grooming, or undefined. Exploring was considered any behavior that involved movement of the animal's head or body that was not grooming-related, and included walking, sniffing, or manipulating any of the objects present in the tray. Grooming included scratching as well as face and paw washing. Immobile did not include assumption of the sleep posture (curling up), which was infrequent and classified instead as undefined. In practice, only “exploring” and “immobile” behaviors, corresponding to type I and type II behaviors, respectively,<sup>14</sup> were observed with sufficient duration and frequency for data analysis.

### Data Acquisition and Analysis

Electroencephalographic signals were amplified using a unity-gain HS-16 headstage preamplifier to reduce movement-related artifacts with a Lynx-8 s-stage amplifier (both from Neuralynx, Inc.) bandpassed between 1 and 325 Hz and digitized at 1,000 Hz using a DigiData 1200 A/D converter (Molecular Devices, Sunnyvale, CA). Data acquisition and processing were controlled with the pClamp software suite (Molecular Devices) and stored for analysis on a Pentium-based personal computer.

Data analysis was performed primarily with custom-written routines in MATLAB (MathWorks, Natick, MA). Origin (OriginLab Corp., Northampton, MA) and Instat (GraphPad Software, Inc., La Jolla, CA) were used for graphical presentation and statistical analysis. In a preprocessing step, raw data were passed through a digital bandpass filter with an attenuation of 40 dB/octave (IIR Butterworth and MATLAB *filtfilt* forward and reverse filtering routine resulting in zero phase shift) designed for the extraction of signals in the  $\theta$ -frequency band. The  $-3$  dB (corner) frequencies were 4 and 12 Hz. Artifacts occurred primarily from mechanical causes and were excluded from analysis together with adjacent data points (0.5–1 s, as necessary). Subsequently, data were sorted by behavior. Raw and filtered data were subdivided into segments of 4,096 points each ( $\sim 4$  s) with 30% overlap (1,365 points). Shorter data segments were not analyzed. All parameters described below were computed for each segment and averaged with other segments obtained for the same drug condition and behavior for a given animal. The number of 4,096-point segments underlying each spectrogram ranged from 1 (isoflurane at high concentrations) to more than 100 (drug-free control, 30%  $\text{N}_2\text{O}$ ) and is indicated for each spectrogram shown.

For spectral analysis, we multiplied data segments with a Hamming window (4,096 points) and computed their fast



Fourier transforms, from which power spectral density was derived (*i.e.*, generally corresponding to the Welch method). From the power spectral density, we extracted the power in distinct frequency bands (the integral of the power spectral density within the frequency ranges detailed above) as well as amplitude and frequency of the  $\theta$  peak. Autocorrelograms were produced with a modified MATLAB routine (xcorr) and were normalized such that autocorrelations at zero lag were identical to 1.

### Statistical Analysis

Unless indicated otherwise, all numerical results are expressed as changes relative to time- and behavior-matched control experiments. Only animals exposed to a specific drug were included in that drug's control group. Linear regression lines were fitted according to the model:  $Y_i = A + (B \times X_i)$ , with the parameters  $A$  (intercept) and  $B$  (slope) estimated by the least squares method. The correlation between drug concentration and change in the measured parameter was considered significant if the null hypothesis of zero slope could be rejected at a  $P$  value of less than 0.05. We assumed a normal distribution for all  $\theta$ -related variables. Excel (Microsoft Corp., Redmond, WA) and Origin were used for statistical analysis. Results are reported as mean  $\pm$  SD. We compared drug effects on  $\theta$  parameters using two-tailed paired  $t$  tests.

## Results

### Three Diverse Anesthetics Differentially Suppress FC

We examined the amnesic potency of isoflurane, halothane, and nitrous oxide by testing animals at drug concentrations that, based on published data<sup>5</sup> and our own preliminary results, we expected to bracket the  $EC_{50}$  concentrations for FC to context and to tone.

As shown in figure 1, all three anesthetics incrementally suppressed freezing to context and tone, reaching essentially complete suppression of learning and memory at the highest concentrations tested. For all three drugs FC to context was more sensitive to inhibition than FC to tone. In percentage of inspired gas,  $EC_{50}$  concentrations derived from the concentration-response relationships for halothane, isoflurane, and nitrous oxide were  $0.14 \pm 0.09$ ,  $0.28 \pm 0.03$ ,  $42 \pm 3$ , respectively, for FC to context and  $0.30 \pm 0.05$ ,  $0.43 \pm 0.05$ ,  $57 \pm 6$ , respectively, for FC to tone.

### Separation of $\theta$ versus Non- $\theta$ States

Electrophysiological data were obtained from eight animals in which we confirmed the location of the recording electrode by histology congruent with local field potential patterns.

The behavioral state determines the pattern of hippocampal local field potentials in the awake, unrestrained animal. Type 1  $\theta$  rhythm is typically present during behaviors generically described as "exploratory." Our behavioral classification of "exploring" versus "immobile" allowed a separation of high and low  $\theta$  states as illustrated in figure 2. During im-

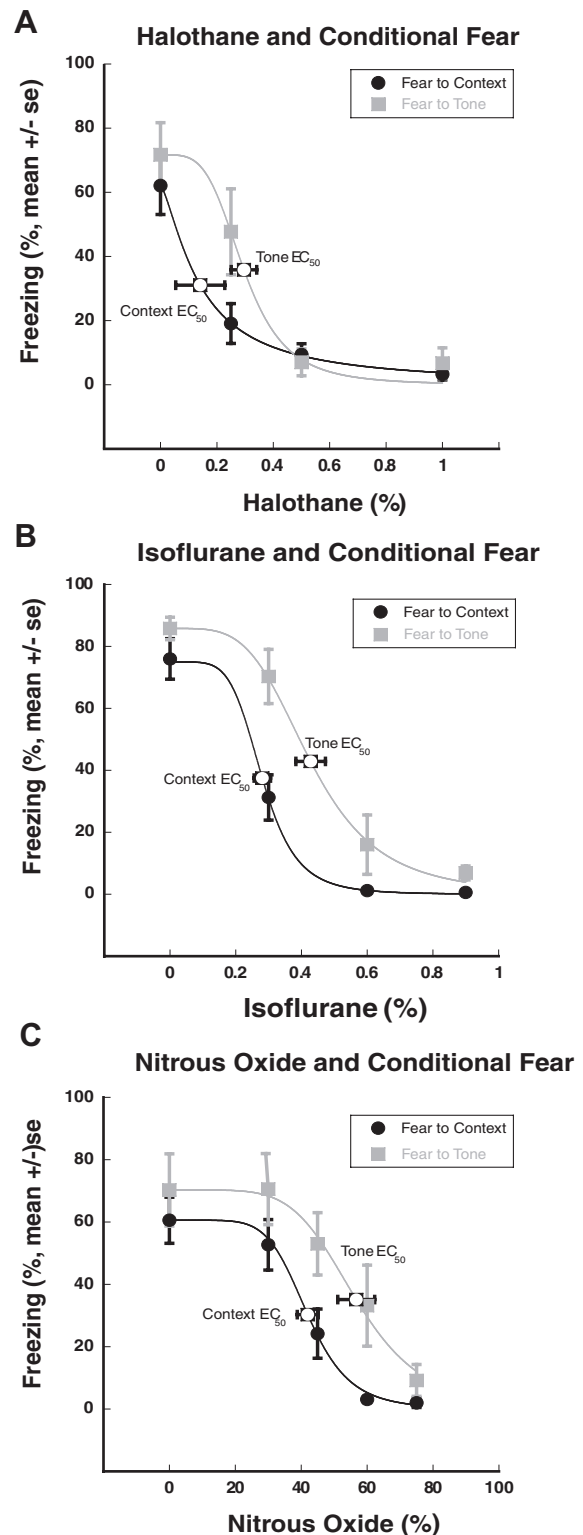

**Fig. 1.** Inhaled agents suppress fear conditioning at subanesthetic concentrations. Halothane (A), isoflurane (B), and nitrous oxide (C) suppressed FC to context more potently than fear conditioning to tone. Both types of fear conditioning were effectively suppressed at concentrations lower than the surgical  $EC_{50}$  (1.1, 1.38, and 221%, respectively).

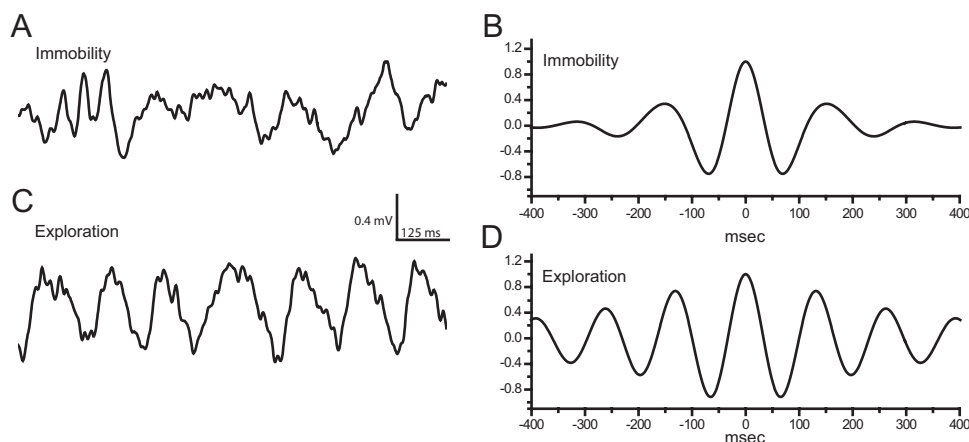

**Fig. 2.** Behavioral scoring system used for electrophysiological experiments (immobile vs. exploring) discriminates between hippocampal  $\theta$  states. Field potentials were irregular during immobility (A) although rhythmic fluctuations at  $\theta$  frequencies dominated during exploration (C). Respective autocorrelograms illustrate the slower frequency (larger interval between peaks) and lack of rhythmicity (rapid damping of side-peaks) of field potentials during immobility (B) compared with exploration (D).

mobility, local field potentials in the hippocampus were characterized by irregular, low frequency activity (fig. 2A). The irregular nature of the fluctuations is reflected in the rapid damping of the side-peaks in the autocorrelogram (fig. 2B). By contrast, during behavior classified as “exploring,” the hippocampal electroencephalogram was characterized by prominent, rhythmic activity in the  $\theta$  band (fig. 2C). The regularity of this oscillation is illustrated by the presence of multiple peaks in the autocorrelation (fig. 2D). Theta peak frequency under drug-free control conditions was  $7.3 \pm 0.24$  Hz for “exploring.” Peak frequency observed during “immobile” was slower, at  $6.2 \pm 0.3$  Hz ( $7.1$ – $7.6$  and  $5.6$ – $6.8$  Hz,  $n = 8$ ;  $P = 0.00018$ ), indicating effective separation of behavioral states with respect to the  $\theta$  rhythm with type 2 (dominant during “immobile”) slower than type 1. Only  $\theta$  exploring (type 1) was used for further analysis.

### $\theta$ Rhythm Persists under Amnesia-inducing Conditions

Exploratory activity occurred in the presence of memory-impairing concentrations of anesthetic agents accompanied by prominent rhythmic activity in the  $\theta$  band (fig. 3A). Power spectra obtained from these experiments reveal that peak amplitude and power (area under the curve) were not substantially altered, but that the frequency of the  $\theta$  peak was slowed by isoflurane, nitrous oxide, and halothane (fig. 3B). The illustrated example shows the effect of the drugs at concentrations that suppress hippocampus-dependent memory to a comparable degree (fig. 1).

### $\theta$ Frequency Is Reduced by Diverse Agents

All tested anesthetic agents caused a concentration-dependent slowing of  $\theta$  peak frequency as shown in the spectra of figure 4A–C. For all anesthetics, we observed significant slowing at the lowest concentration producing amnesia. Isoflurane had the most pronounced effect on peak frequency:  $0.32 \pm 0.03\%$  slowed the  $\theta$  peak frequency by 1 Hz ( $7.3 \pm 0.2$ – $6.3 \pm 0.4$  Hz,  $n = 7$ ;  $P = 0.00029$ ); 60%  $N_2O$  slowed the  $\theta$  peak by 0.7 Hz

( $7.4 \pm 0.2$ – $6.7 \pm 0.2$  Hz,  $n = 8$ ,  $P = 0.0013$ ); and halothane ( $0.24 \pm 0.01\%$ ) reduced the frequency by 0.5 Hz ( $7.4 \pm 0.2$ – $6.9 \pm 0.1$  Hz,  $n = 6$ ,  $P = 0.0108$ ).

To facilitate the comparison between agents with different potencies, we normalized the effect on  $\theta$  frequency to the individual agents’ amnesic  $EC_{50}$  for inhibition of FC to context as determined in behavioral experiments. The results for all experiments are summarized as a concentration-response relationship in figure 4D. The correlation coefficients for all three least-squares linear fits were similar and significantly different from zero ( $R = 0.84$ ,  $0.80$ , and  $0.80$  for isoflurane, nitrous oxide, and halothane,  $P$  value of less than  $0.001$  for each). The slopes of the regression lines were steeper for isoflurane and nitrous oxide ( $-0.59$  and  $-0.5$ ) than for halothane ( $-0.19$ ).

### Anesthetic Effects on $\theta$ Power and Rhythmicity

To test for a relationship with respect to anesthetic-induced amnesia, we analyzed three measures of  $\theta$  power (amplitude of  $\theta$  peak, the spectral power within  $\pm 1$  Hz of the peak, and the power in the 4–12 Hz band) analogously to  $\theta$  frequency and grouped them by concentration. Summaries are shown in figure 5, A and B (power 4–12 Hz not shown). In contrast to the effect on  $\theta$  frequency, no common systematic change is apparent for the three drugs.

We also investigated whether anesthetics affected the rhythmicity of  $\theta$  oscillations. We expressed the rhythmicity as the height of the second peak in the autocorrelogram (fig. 2, B and D). As can be seen from figure 5C, none of the agents had a systematic effect on the regularity of  $\theta$  rhythm during exploratory activity.

### Discussion

There were two principal findings from this study. First, that isoflurane, halothane, and nitrous oxide all inhibited hippocampus-dependent FC more effectively than hippocam-

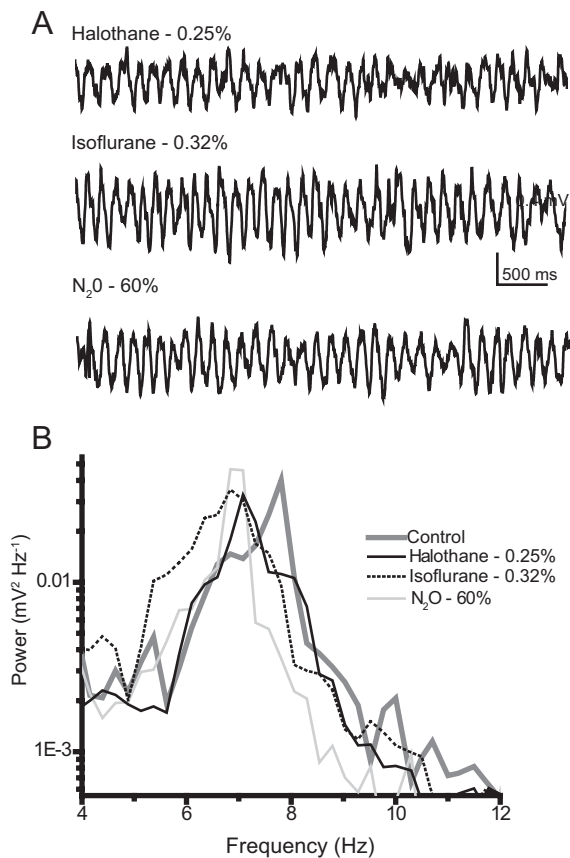

**Fig. 3.** Hippocampal activity at subhypnotic amnestic concentrations. (A) Raw hippocampal electroencephalographic traces recorded from one individual under amnestic concentrations of halothane (0.25%, top), isoflurane (0.32%, middle), and nitrous oxide (N<sub>2</sub>O; 60%, bottom) during exploratory activity. All three traces show expression of the  $\theta$  rhythm in the presence of amnestic concentrations of these agents. (B) Spectrograms obtained from concatenation of all epochs spent exploring during anesthetic exposure (same experiments shown in A: 20, 15, 4, and 14 segments for halothane, isoflurane, nitrous oxide, and control, respectively) reveal comparable slowing of the  $\theta$  peak frequency by all three agents at the concentrations applied (control, 7.6 Hz; isoflurane, 6.6 Hz; N<sub>2</sub>O, 6.6 Hz; halothane, 6.8 Hz).

pus-independent FC. Second, each agent slowed  $\theta$  frequency in proportion to its impairment of FC. These results are consistent with the hypothesis that a variety of agent-specific interactions with molecular targets converge to a uniform effect on an important network characteristic that is essential to proper hippocampal function during learning, in this case,  $\theta$  rhythm frequency. The degree of slowing observed at equivalently amnestic concentrations, however, varied—possibly reflecting the diversity of affected molecular targets.

### $\theta$ Rhythm and Memory

Evidence accumulated during past decades provides extensive support for the importance of the  $\theta$  rhythm in learning and memory. Some early evidence for a role of  $\theta$  oscillations was obtained from rabbits undergoing classic (delay) condi-

tioning. Although this learning task is not strictly hippocampus-dependent, rabbits acquired the learning task faster if  $\theta$  rhythm dominated their hippocampal electroencephalogram just before the presentation of paired stimuli.<sup>30,31</sup> Conversely, administration of the conditioned-unconditioned stimulus pair during non- $\theta$  states slowed learning whereas synchronizing stimuli with spontaneous  $\theta$  oscillations dramatically accelerated acquisition of conditioned reflex.<sup>32,33</sup> Because the importance of the hippocampus increases when a learning task requires temporal processing, even nonspatial tasks that are made discontinuous (*e.g.*, by imposing an empty “trace” interval between the conditioned and unconditioned stimulus) become hippocampus-dependent. Under the trace paradigm, neuronal responsiveness in the hippocampus to a conditioned stimulus developed before behavioral expression of the conditioned reflex in the individuals that acquired the reflex.<sup>34</sup> Hence, it is not surprising that  $\theta$  power positively correlated with learning in trace eye-blink conditioning in the early stages of learning.<sup>35</sup>

Although most published work does not discriminate between the influence of  $\theta$  power and frequency, recent data provide support for a role of  $\theta$  frequency *per se* for the rate of learning. Baseline  $\theta$  frequency recorded during quiet waking and paradoxical sleep (*i.e.*, not during learning) positively correlated with the rate of learning in rats subjected to an operant-conditioning paradigm.<sup>36</sup> Hence, both higher  $\theta$  frequency and increased  $\theta$  power at baseline appear to improve learning performance.

The results of these observational studies are complemented by investigations that actively modulated the  $\theta$  rhythm by pharmacological, physical, or genetic means and observed the effects on learning and memory. Injection of tetracaine into the medial septum ablated hippocampal  $\theta$  but preserved “upstream” rhythmicity, leading to severe learning impairment that was, however, largely reversible by rhythmic exogenous stimulation of the fornix that generated  $\theta$ -like synchronized activity in the hippocampus.<sup>23</sup> Pan and McNaughton<sup>21</sup> slowed  $\theta$  oscillations either by injection of chlordiazepoxide or systemic cooling, testing learning and memory using a Morris water maze. They found that hippocampus-dependent learning was sensitive to changes in  $\theta$  frequency. In fact, slowing  $\theta$  oscillations by 0.35–0.5 Hz<sup>37</sup> produced a measurable memory impairment but slowed oscillations by 1 Hz produced a substantial impairment.<sup>21</sup> Likewise, mice with a deletion of the  $\gamma$ -aminobutyric acid transporter type 1 displayed slowed type 1  $\theta$  rhythm, reduced long-term potentiation, and impaired hippocampal learning.<sup>38</sup> By contrast, drug-induced acceleration of  $\theta$  frequency by 5–10% above baseline improved learning.<sup>39</sup> These results thus indicate that learning is sensitive to changes in  $\theta$  frequency by amounts comparable with those produced by amnestic concentration of the agents we studied.

Changes in  $\theta$  frequency may not, however, be the only means by which drugs can influence memory *via*  $\theta$ -rhythm modulation. The cannabinoid CP55940 was shown to impair learning in hippocampus-dependent delayed spatial alternation tasks in proportion to the degree of selective suppression of  $\theta$

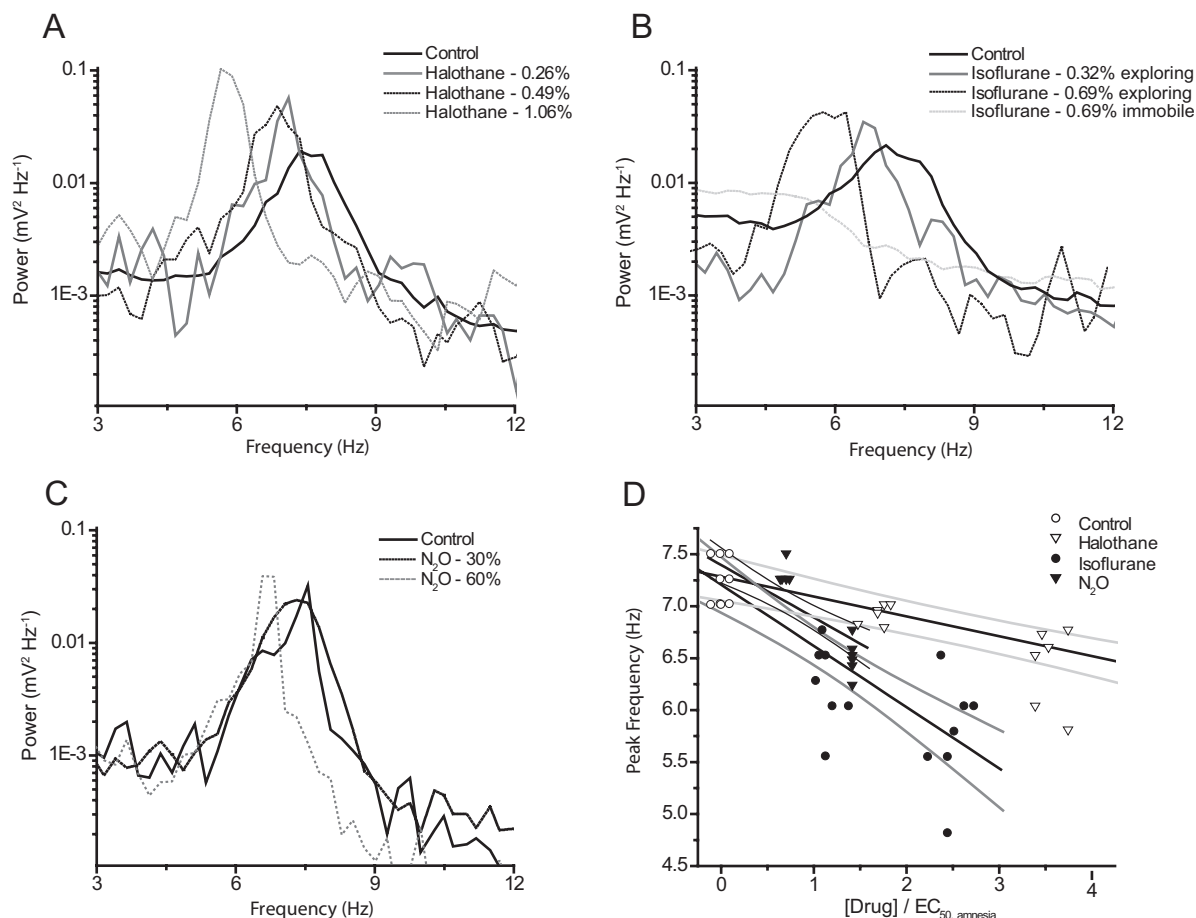

**Fig. 4.** Anesthetics slow  $\theta$  rhythm. Spectrograms illustrating the concentration-dependent slowing of  $\theta$  rhythms by halothane (A), isoflurane (B), and nitrous oxide (N<sub>2</sub>O) (C). Exploratory activity was absent in rats exposed to isoflurane concentrations above 0.5 minimal alveolar concentration, but animals continued to explore spontaneously under concentrations of halothane approaching 1.0 minimal alveolar concentration. (A) Spectrograms based on 47, 3, 6, and 14 segments for control and halothane 0.26, 0.49, and 1.06%, respectively. (B) Spectrogram for immobility under 0.69% isoflurane demonstrating the absence of a  $\theta$  peak during immobility. Based on 106, 14, 5, and 284 segments for control and isoflurane 0.3%, 0.69% exploring, and 0.69% immobile, respectively. (C) Spectrograms based on 14, 43, and 4 segments for control, and 30 and 60% N<sub>2</sub>O, respectively. (D) Summary of all experiments. The effect of three anesthetics on  $\theta$  frequency is plotted as a function of anesthetic concentration. Lines represent linear regression fits and are bracketed by 95% confidence intervals. To facilitate comparison, anesthetic concentrations are expressed as multiples of EC<sub>50</sub> amnesia for contextual fear conditioning (FC) (see Fig. 1) and x-values were scattered to reveal overlying data points for control and N<sub>2</sub>O 30%.

power, a correlation independent of locomotion speed.<sup>22</sup> Likewise, we showed previously that suppression of  $\theta$  power without a change in  $\theta$  frequency produced by the nonimmobilizer 1,2-dichlorohexafluorocyclobutane (F6, 2N)<sup>28</sup> also correlated with impairment of contextual FC.<sup>8</sup> In fact, the muscarinic receptor blocker scopolamine accelerates  $\theta$  oscillations but impairs learning and memory.<sup>40,41</sup> Scopolamine, however, also suppresses  $\theta$  power. Therefore, scopolamine's suppression of  $\theta$  power may override its effect on  $\theta$  frequency, resulting in a net proamnesic effect.

### Anesthetic-induced Suppression of Learning and Memory

Considering the importance of amnesia as an anesthetic end-point during surgical procedures under general anesthesia, its mechanisms have not been studied extensively. From the

variety of learning types that exist in mammals, those subserving what is commonly referred to as episodic and episodic-like memory in humans and animals, respectively, are tightly linked to the intact functioning of the medial temporal lobe in general and the hippocampal formation in particular. Contextual FC requires an intact hippocampus and is the primary target of our investigation (note that the terms "episodic," "explicit," "conscious," and "declarative memory" are closely related and require intact hippocampal processing). However, to place our experiments into the framework of existing literature, we also tested FC to tone as a hippocampus-independent control paradigm.

From the existing, rather piecemeal, data on the amnesic profiles of the three drugs tested in our experiments, the following picture emerges: early clinical observations<sup>42,43</sup> and studies in human volunteers<sup>44,45</sup> found that nitrous ox-



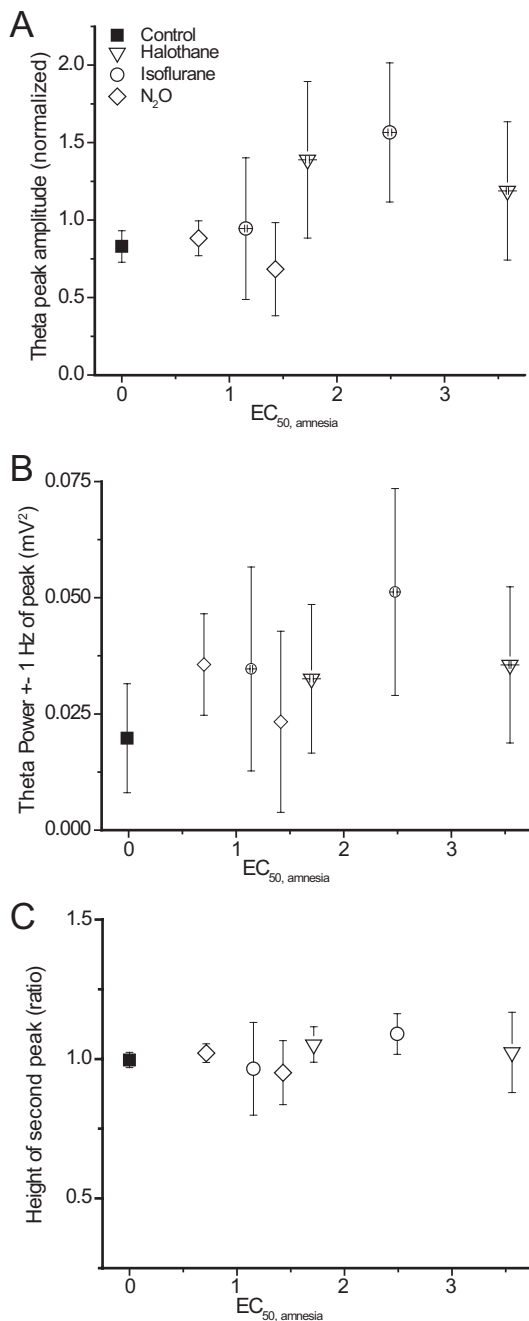

**Fig. 5.** Anesthetics did not systematically modulate  $\theta$  power and rhythmicity. No common pattern of anesthetic effect on  $\theta$  peak amplitude (A),  $\theta$  power (B), or  $\theta$  rhythmicity (C) was apparent.

ide suppressed episodic memory at subhypnotic concentrations and that conscious memory appeared to be more sensitive to interference than other forms of memory. The higher sensitivity of hippocampus-dependent learning was confirmed in animal experiments using eye-blink conditioning, an experimental assay capable of separately assessing hippocampus-dependent (trace) *versus* independent (delay) learning.<sup>46</sup> Thus, although episodic memory in humans may differ qualitatively from that in animals, experimental evidence supports the notion that differences in the sensitivity of various memory systems to nitrous oxide exist in multiple species.

Most data on isoflurane-induced memory suppression are derived from FC-based experiments. Similar to nitrous oxide, isoflurane-impaired learning and memory at subhypnotic concentrations and contextual (*i.e.*, hippocampus-dependent) FC was more sensitive than cued (*i.e.*, hippocampus-independent) FC. It is noteworthy that the  $EC_{50}$  of isoflurane for contextual FC that we determined in rats (0.28%) is close to its  $EC_{50}$  for suppression of episodic memory in human volunteers (0.24%).<sup>44</sup>

Less is known about halothane. The existing data suggest only that very low halothane concentrations (behaviorally subhypnotic, but not further defined) do not affect acquisition (learning) but substantially impair retention (memory),<sup>47</sup> although even “surgical” concentrations of halothane (up to 2%, but not further specified) fail to suppress completely trace conditioning to tone (a hippocampus-independent task).<sup>48</sup> We found that halothane showed the greatest discrimination between the two forms of FC with a more than two-fold difference in  $EC_{50}$  ( $0.14 \pm 0.09$  and  $0.3 \pm 0.04\%$ , respectively). An alternate way of expressing this finding is that halothane is the weakest inhibitor of hippocampus-independent learning (relative to its lipid solubility), as found in a recent study using inhibitory avoidance training as a learning paradigm.<sup>7</sup>

When tested under identical conditions, the three anesthetics we studied suppressed FC to context at lower concentrations than FC to tone ( $EC_{50\text{Tone}}/EC_{50\text{Context}}$  were 1.35, 1.5, and 2.1 for nitrous oxide, isoflurane, and halothane, respectively). A similar differential amnestic profile was previously reported for the nonimmobilizer 1,2-dichlorohexafluorocyclobutane ( $EC_{50\text{Tone}}/EC_{50\text{Context}}$ , 1.7).<sup>8</sup> We interpret these results as indicating that hippocampal processing increases the susceptibility of learning and memory to interference. Based on our electrophysiological findings, we suggest that this result might be attributable to the dependence of the hippocampus on large-scale synchronization by the  $\theta$  rhythm, a dependence not shared by other important memory-processing structures, including the amygdala. An alternative (but not mutually exclusive) explanation is that local expression of critical types of receptors or other circuit elements that produce or regulate synaptic plasticity are more sensitive to anesthetics in the hippocampus than in the amygdala. For this to be the case, however, one would have to postulate region-specific differences in the sensitivity of receptors to tested drugs. Such quantitative studies have not been performed.

How could slowing of the  $\theta$  rhythm affect learning and memory? Hippocampal synaptic plasticity (and, by extension, hippocampus-dependent learning and memory) is known to depend on precise synchronization of cell spiking with the phase of ongoing network activity.<sup>49</sup> This dependence may not be shared by other forms of learning, because there is no direct evidence for either hippocampus-independent  $\theta$ -rhythm generation or for  $\theta$  phase synchrony playing as important a role in the amygdala as it does in the hippocampus and in the intimately related prefrontal cortex<sup>18</sup>

during memory encoding.<sup>50</sup> If slowing of  $\theta$  oscillations is particularly disruptive for learning-related processes in the hippocampus, a prediction testable in future experiments would be that a systemically administered drug that inhibits long-term potentiation exclusively by direct *N*-methyl-D-aspartic acid receptor blockade should be equally effective in both structures and for both types of FC. In addition, these experiments were conducted in different groups of animals exposed to anesthetics when measuring either hippocampal oscillations or conducting fear-conditioning experiments. By simultaneously measuring hippocampal oscillations and behavioral responses, it may be possible to extend this correlation to the performance of individual animals rather than populations.

### Is There a Single Molecular Target that Mediates Effects on $\theta$ Rhythm?

We postulated that the actions of several inhaled agents on a diverse set of molecular targets converge on the  $\theta$ -oscillation circuitry to produce a common network-level effect: a disruption of the endogenous temporal metric that interferes with the distinctive “what-where-when” associations of hippocampus-dependent episodic declarative memory.<sup>51,52</sup> However, is it possible that modulation of a single molecular target is responsible for the observed effect? One such candidate could be a member of the K2P channel family. TREK-1 potassium channels are enhanced by halothane and nitrous oxide<sup>53</sup> and TREK-1 knockouts are less sensitive to immobility and loss of righting reflex,<sup>54</sup> although some researchers are skeptical of a causal relationship between mutation and anesthetic resistance.<sup>55</sup> However, despite extensive studies, there is no reported phenotype of TREK-1 knockouts with respect to learning, memory, or electroencephalographic patterns. Nevertheless, considering the heavy expression of TREK-1 in the septum,<sup>56</sup> an important contribution of these channels to anesthetic-induced changes in  $\theta$  rhythm is a possibility. Alternatively, and perhaps more likely, a range of actions on different targets by each anesthetic may lead to slowing of the  $\theta$  rhythm.

### Conclusion

In summary, we have found a correlation between the concentration-dependent suppression of hippocampus-dependent learning and a reduced frequency of the hippocampal  $\theta$  rhythm. This correlation, which was present for three different inhaled anesthetics that modulate different sets of molecular targets, supports the hypothesis that modulation of the hippocampal  $\theta$  rhythm contributes to anesthetic-induced amnesia.

The authors thank Marnie Filstein, B.A. (Administrative Assistant, Department of Anesthesiology, University of Wisconsin, Madison, Wisconsin), for secretarial help and Harald Hentschke, Ph.D. (Assistant Professor, Department of Anesthesiology, University of Tübingen, Tübingen, Germany), for continued help with data analysis.

### References

1. Hemmings HC Jr, Akabas MH, Goldstein PA, Trudell JR, Orser BA, Harrison NL: Emerging molecular mechanisms

- of general anesthetic action. *Trends Pharmacol Sci* 2005; 26:503–10
2. Franks NP: General anaesthesia: From molecular targets to neuronal pathways of sleep and arousal. *Nat Rev Neurosci* 2008; 9:370–86
3. Chortkoff BS, Bennett HL, Eger EI, 2nd: Subanesthetic concentrations of isoflurane suppress learning as defined by the category-example task. *ANESTHESIOLOGY* 1993; 79: 16–22
4. Chortkoff BS, Gonsowski CT, Bennett HL, Levinson B, Crankshaw DP, Dutton RC, Ionescu P, Block RI, Eger EI, 2nd: Subanesthetic concentrations of desflurane and propofol suppress recall of emotionally charged information. *Anesth Analg* 1995; 81:728–36
5. Dutton RC, Maurer AJ, Sonner JM, Fanselow MS, Laster MJ, Eger EI, 2nd: The concentration of isoflurane required to suppress learning depends on the type of learning. *ANESTHESIOLOGY* 2001; 94:514–9
6. Gonsowski CT, Chortkoff BS, Eger EI, 2nd, Bennett HL, Weiskopf RB: Subanesthetic concentrations of desflurane and isoflurane suppress explicit and implicit learning. *Anesth Analg* 1995; 80:568–72
7. Alkire MT, Gorski LA: Relative amnesic potency of five inhalational anesthetics follows the Meyer-Overton rule. *ANESTHESIOLOGY* 2004; 101:417–29
8. Dutton RC, Maurer AJ, Sonner JM, Fanselow MS, Laster MJ, Eger EI 2nd: Short-term memory resists the depressant effect of the nonimmobilizer 1-2-dichlorohexafluorocyclobutane (2N) more than long-term memory. *Anesth Analg* 2002; 94:631–9
9. Nishikawa K, MacIver MB: Excitatory synaptic transmission mediated by NMDA receptors is more sensitive to isoflurane than are non-NMDA receptor-mediated responses. *ANESTHESIOLOGY* 2000; 92:228–36
10. Nishikawa K, MacIver MB: Agent-selective effects of volatile anesthetics on GABAA receptor-mediated synaptic inhibition in hippocampal interneurons. *ANESTHESIOLOGY* 2001; 94:340–7
11. Simon W, Hapfelmeier G, Kochs E, Zieglgänsberger W, Rammes G: Isoflurane blocks synaptic plasticity in the mouse hippocampus. *ANESTHESIOLOGY* 2001; 94:1058–65
12. Chesney MA, Perouansky M, Pearce RA: Differential uptake of volatile agents into brain tissue *in vitro*. Measurement and application of a diffusion model to determine concentration profiles in brain slices. *ANESTHESIOLOGY* 2003; 99:122–30
13. Perouansky M, Pearce RA: Effects on synaptic inhibition in the hippocampus do not underlie the amnesic and convulsive properties of the nonimmobilizer 1,2-dichlorohexafluorocyclobutane. *ANESTHESIOLOGY* 2004; 101:66–74
14. Kramis R, Vanderwolf CH, Bland BH: Two types of hippocampal rhythmical slow activity in both the rabbit and the rat: Relations to behavior and effects of atropine, diethyl ether, urethane, and pentobarbital. *Exp Neurol* 1975; 49:58–85
15. Buzsáki G: Theta oscillations in the hippocampus. *Neuron* 2002; 33:325–40
16. Klimesch W, Freunberger R, Sauseng P: Oscillatory mechanisms of process binding in memory. *Neurosci Biobehav Rev* 2010; 34:1002–14
17. Masquelier T, Hugues E, Deco G, Thorpe SJ: Oscillations, phase-of-firing coding, and spike timing-dependent plasticity: An efficient learning scheme. *J Neurosci* 2009; 29: 13484–93
18. Siapas AG, Lubenov EV, Wilson MA: Prefrontal phase locking to hippocampal theta oscillations. *Neuron* 2005; 46: 141–51
19. Paz R, Bauer EP, Paré D: Theta synchronizes the activity of medial prefrontal neurons during learning. *Learn Mem* 2008; 15:524–31

20. Mizuseki K, Sirota A, Pastalkova E, Buzsáki G: Theta oscillations provide temporal windows for local circuit computation in the entorhinal-hippocampal loop. *Neuron* 2009; 64:267–80
21. Pan WX, McNaughton N: The medial supramammillary nucleus, spatial learning and the frequency of hippocampal theta activity. *Brain Res* 1997; 764:101–8
22. Robbe D, Montgomery SM, Thome A, Rueda-Orozco PE, McNaughton BL, Buzsáki G: Cannabinoids reveal importance of spike timing coordination in hippocampal function. *Nat Neurosci* 2006; 9:1526–33
23. McNaughton N, Ruan M, Woodnorth MA: Restoring theta-like rhythmicity in rats restores initial learning in the Morris water maze. *Hippocampus* 2006; 16:1102–10
24. Fanselow MS: Conditioned and unconditional components of post-shock freezing. *Pavlov J Biol Sci* 1980; 15:177–82
25. Fanselow MS, Kim JJ: Acquisition of contextual Pavlovian fear conditioning is blocked by application of an NMDA receptor antagonist D,L-2-amino-5-phosphonovaleric acid to the basolateral amygdala. *Behav Neurosci* 1994; 108: 210–2
26. White PF, Johnston RR, Eger EI 2nd: Determination of anesthetic requirement in rats. *ANESTHESIOLOGY* 1974; 40: 52–7
27. Gong D, Fang Z, Ionescu P, Laster MJ, Terrell RC, Eger EI 2nd: Rat strain minimally influences anesthetic and convulsant requirements of inhaled compounds in rats. *Anesth Analg* 1998; 87:963–6
28. Perouansky M, Hentschke H, Perkins M, Pearce RA: Amnesic concentrations of the nonimmobilizer 1,2-dichloro-hexafluorocyclobutane (F6, 2N) and isoflurane alter hippocampal theta oscillations *in vivo*. *ANESTHESIOLOGY* 2007; 106:1168–76
29. Jellema T, Weijnen JA: A slim needle-shaped multiwire microelectrode for intracerebral recording. *J Neurosci Methods* 1991; 40:203–9
30. Berry SD, Thompson RF: Prediction of learning rate from the hippocampal electroencephalogram. *Science* 1978; 200:1298–300
31. Nokia MS, Penttonen M, Korhonen T, Wikgren J: Hippocampal theta (3–8 Hz) activity during classical eyeblink conditioning in rabbits. *Neurobiol Learn Mem* 2008; 90: 62–70
32. Seager MA, Johnson LD, Chabot ES, Asaka Y, Berry SD: Oscillatory brain states and learning: Impact of hippocampal theta-contingent training. *Proc Natl Acad Sci USA* 2002; 99:1616–20
33. Griffin AL, Asaka Y, Darling RD, Berry SD: Theta-contingent trial presentation accelerates learning rate and enhances hippocampal plasticity during trace eyeblink conditioning. *Behav Neurosci* 2004; 118:403–11
34. McEchron MD, Disterhoft JF: Hippocampal encoding of non-spatial trace conditioning. *Hippocampus* 1999; 9:385–96
35. Nokia MS, Penttonen M, Korhonen T, Wikgren J: Hippocampal theta-band activity and trace eyeblink conditioning in rabbits. *Behav Neurosci* 2009; 123:631–40
36. Santos LM, Dziras K, Kubo R, Silva MT, Ribeiro S, Sameshima K, Valle AC, Timó-laria C: Baseline hippocampal theta oscillation speeds correlate with rate of operant task acquisition. *Behav Brain Res* 2008; 190:152–5
37. Whishaw IQ, Vanderwolf CH: Hippocampal EEG and behavior: Effects of variation in body temperature and relation of EEG to vibrissae movement, swimming and shivering. *Physiol Behav* 1971; 6:391–7
38. Gong N, Li Y, Cai GQ, Niu RF, Fang Q, Wu K, Chen Z, Lin LN, Xu L, Fei J, Xu TL: GABA transporter-1 activity modulates hippocampal theta oscillation and theta burst stimulation-induced long-term potentiation. *J Neurosci* 2009; 29:15836–45
39. Stäubli U, Xu FB: Effects of 5-HT<sub>3</sub> receptor antagonism on hippocampal theta rhythm, memory, and LTP induction in the freely moving rat. *J Neurosci* 1995; 15:2445–52
40. Givens B, Olton DS: Local modulation of basal forebrain: Effects on working and reference memory. *J Neurosci* 1994; 14:3578–87
41. Markowska AL, Olton DS, Givens B: Cholinergic manipulations in the medial septal area: Age-related effects on working memory and hippocampal electrophysiology. *J Neurosci* 1995; 15:2063–73
42. Brice DD, Hetherington RR, Utting JE: A simple study of awareness and dreaming during anaesthesia. *Br J Anaesth* 1970; 42:535–42
43. Agarwal G, Sikh SS: Awareness during anaesthesia. A prospective study. *Br J Anaesth* 1977; 49:835–8
44. Dwyer R, Bennett HL, Eger EI 2nd, Heilbron D: Effects of isoflurane and nitrous oxide in subanesthetic concentrations on memory and responsiveness in volunteers. *ANESTHESIOLOGY* 1992; 77:888–98
45. Block RI, Ghoneim MM, Pathak D, Kumar V, Hinrichs JV: Effects of a subanesthetic concentration of nitrous oxide on overt and covert assessments of memory and associative processes. *Psychopharmacology (Berl)* 1988; 96: 324–31
46. Ghoneim MM, El-Zahaby HM, Block RI: Classical conditioning during nitrous oxide treatment: Influence of varying the interstimulus interval. *Pharmacol Biochem Behav* 1999; 62:449–55
47. Rosman E, Quartermain D, Pang R, Turndorf H: Halothane anesthesia causes state-dependent retrieval failure in mice. *Physiol Behav* 1992; 52:449–53
48. Pang R, Turndorf H, Quartermain D: Pavlovian fear conditioning in mice anesthetized with halothane. *Physiol Behav* 1996; 59:873–5
49. Rutishauser U, Ross IB, Mamelak AN, Schuman EM: Human memory strength is predicted by theta-frequency phase-locking of single neurons. *Nature* 2010; 464:903–7
50. Hyman JM, Zilli EA, Paley AM, Hasselmo ME: Working memory performance correlates with prefrontal-hippocampal theta interactions but not with prefrontal neuron firing rates. *Front Integr Neurosci* 2010; 4:2
51. Devito LM, Eichenbaum H: Distinct contributions of the hippocampus and medial prefrontal cortex to the “what-where-when” components of episodic-like memory in mice. *Behav Brain Res* 2010; 215:318–25
52. Eichenbaum H: A cortical-hippocampal system for declarative memory. *Nat Rev Neurosci* 2000; 1:41–50
53. Gruss M, Bushell TJ, Bright DP, Lieb WR, Mathie A, Franks NP: Two-pore-domain K<sup>+</sup> channels are a novel target for the anesthetic gases xenon, nitrous oxide, and cyclopropane. *Mol Pharmacol* 2004; 65:443–52
54. Heurteaux C, Guy N, Laigle C, Blondeau N, Duprat F, Mazzuca M, Lang-Lazdunski L, Widmann C, Zanzouri M, Romey G, Lazdunski M: TREK-1, a K<sup>+</sup> channel involved in neuroprotection and general anesthesia. *EMBO J* 2004; 23:2684–95
55. Eger EI 2nd, Raines DE, Shafer SL, Hemmings HC Jr, Sonner JM: Is a new paradigm needed to explain how inhaled anesthetics produce immobility? *Anesth Analg* 2008; 107: 832–48
56. Hervieu GJ, Cluderay JE, Gray CW, Green PJ, Ranson JL, Randall AD, Meadows HJ: Distribution and expression of TREK-1, a two-pore-domain potassium channel, in the adult rat CNS. *Neuroscience* 2001; 103:899–919
